# Supplementary material for: HbF Levels in Sickle Cell Disease Are Associated with Proportion of Circulating Hematopoietic Stem and Progenitor Cells and CC-Chemokines
Source: MDPI journal article supplement (doi:10.3390/cells9102199), 2020-09-29
Supplement: s1 [file s1]

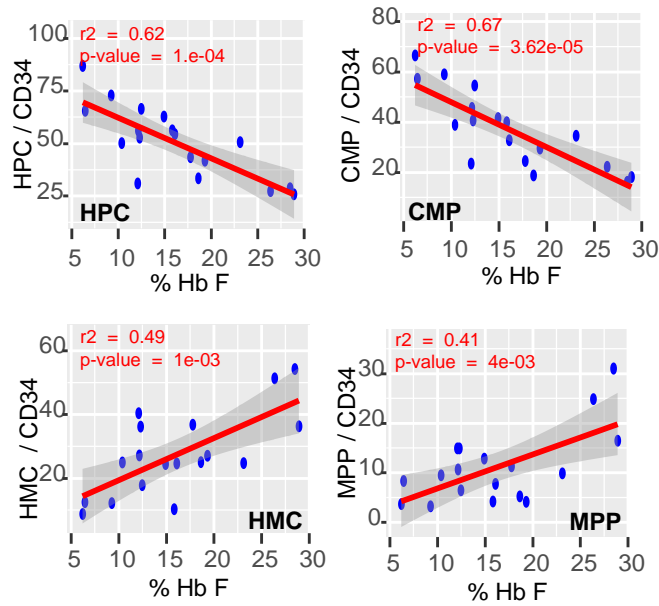

n= 20

**Figure S1: Regression analysis of the percentage of HbF as a function of the percentage of HPCs, CMPs, HMCs, and MPPs/CD34bright.** Patients treated with HU for less than 30 months were excluded. Linear regression line is represented in red ( $r^2$  and F-statistic p-values are provided above). Grey smooth represents the 95% confidence for prediction for the linear models. The percentage HbF is negatively correlated with the proportion of HPC/CD34 and positively correlated with the proportion of HMC/CD34, n=20.

Figure S1
