# Supplementary material for: HbF Levels in Sickle Cell Disease Are Associated with Proportion of Circulating Hematopoietic Stem and Progenitor Cells and CC-Chemokines
Source: Cells. 2020 Sep 29;9(10):2199. doi: 10.3390/cells9102199 (PMC7650715; doi:10.3390/cells9102199)
Supplement: Supplementary file 1 [file cells-09-02199-s001.zip]

Archive with 4 entries (4 files):
- Sup figures.pdf
- Table S1.docx
- Table S2.docx
- Table S3.xlsx
