# Supplementary material for: HbF Levels in Sickle Cell Disease Are Associated with Proportion of Circulating Hematopoietic Stem and Progenitor Cells and CC-Chemokines
Source: Cells. 2020 Sep 29;9(10):2199. doi: 10.3390/cells9102199 (PMC7650715; doi:10.3390/cells9102199)
Supplement: Supplementary file 1 [file cells-09-02199-s001.zip › Table S3.xlsx]

## Sheet: Table S2
Data	status	SixCKine	BCA_1	CTACK	EGF	ENA_78	Eotaxin	Eotaxin_2	Eotaxin_3	FGF_2	Flt_3L	Fractalkine	G_CSF	GM_CSF	GRO alpha	I_309	IFNa2	IFNy	IL_10	IL_12P40	IL_12P70	IL_13	IL_15	IL_16	IL_17A	IL_18	IL_1a	IL_1B	IL_1RA	IL_2	IL_20	IL_21	IL_23	IL_28A	IL_3	IL_33	IL_4	IL_5	IL_6	IL_7	IL_8	IL_9	IP_10	LIF	MCP_1	MCP_2	MCP_3	MCP_4	MDC
V02r	healthy control	987.775	448.155	441.625	106.565	186.585	210.4	101.55	62.425	586.83	246.975	1348.67		422.735	560.545	3.39	897.84	252.94	13.26	267.42	288.445	112.07	68.865	653.095	133.74	1677.22	757.46	64.195	190.015	62.42	506.395	30.94	5962.74	1108.14	0.635	238.16	93.7	15.73	48.82	18.095	53.28	48.445	563.965	225.95	279.77	69.35	205.12	150.755	1987.74
V05r	healthy control	788.655	68.265	483.89	54.935	181.485	54.53	17.23	15.695	245.035	69.71	656.16	29.955	39.535	684.705	2.07	170.155	61.255	1.76	141.15	78.54	44.06	17.3	975.405	32.645	968.49	682.025	10.82	183.08	13.095	397.64	23.515	4132.8	1722.41	0.455	150.355	185.655	3.61	30	3.545	30.82	6.45	264.075	54.34	146.985	28.965	131.925	51.575	1034.59
V06r	healthy control	106.92	51.02	558.63	5.04	715.77	31.765	110.925	7.2	31.17	6.69	5.07	3.22	3.8	847.42	0.79	7.93	4.2	0.78	6.23	0.01	0.09	0.94	75.26	0.25	1.38	5.88	0.15	11.68	0.35	80.865	0.06	11.56	40.01	0.39	10.86	4.51	0.535	0.32	0.46	1.815	0.38	270.885	5.25	272.4	31.925	14.745	8.775	604.44
V07r	healthy control	36.875	88.78	744.165	9.625	284.235	133.57	227.22	3.69	35.26	6.69	6.435	3.22	4.555	902.445	0.66	10.14	4.38	0.29	2.445	0.36	0.09	1.085	42.95	0.49	100.505	2.73	0.15	31.635	0.3	1.88	0.06	11.56	4.36	0.445	4.61	4.225	0.345	0.32	0.46	4.985	0.425	281.54	0.12	277.39	15.565	0.81	10.875	464.185
V10r	healthy control	604.765	54.86	276.625	13.45	399.32	48.36	156.575	9.285	144.61	52.415	152.82	38.56	73.18	563.275	1.91	106.565	45.6	0.64	57.285	65.12	29.73	14.485	977.03	27.66	426.32	414.28	13.57	78.34	4.265	503.27	21.19	3328.27	1619.03	0.455	125.545	146.18	1.37	29.14	0.46	24.44	9.91	92.685	62.4	60.745	24.25	141.365	56.085	678.265
V03r	healthy control	285.3	17.805	286.265	148.035	2021.17	21.97	153.645	5.05	47.48	6.69	13.265	3.22	215.21	8354.44	0.86	21.43	2.135	0.27	7.255	0.36	0.53	0.54	5.81	1.645	118.05	2.73	0.26	142.85	0.15	1.88	0.06	493.945	4.36	0.455	26.795	7.425	0.28	0.59	1.76	4.12	14.785	232.195	0.12	217.965	22.86	0.81	2.44	421.055
V08r	healthy control	166.82	17.245	570.325	6.725	144.335	14.53	66.015	3.02	40.105	32.97	10.53	20.21	2.915	104.34	1.045	43.16	4.025	2.065	1.18	1.04	0.09	1.93	72.49	3.905	39.985	13.175	0.15	48.25	0.37	35.28	0.06	11.56	4.36	0.44	4.61	2.14	0.5	0.32	0.46	2.05	0.33	341.22	0.12	316.735	16.715	0.81	2.44	469.39
average Healthy control		425.301	106.59	480.218	49.1964	561.844	73.5893	119.023	15.195	161.499	60.3057	313.279	16.3975	108.847	1716.74	1.53214	179.603	53.505	2.72357	68.995	61.9821	26.6657	15.0207	400.291	28.6193	475.993	268.326	12.7564	97.9786	11.5643	218.173	10.8407	1993.2	643.24	0.467857	80.1336	63.405	3.19571	15.6443	3.60571	17.3586	11.5321	292.366	49.7571	224.57	29.9471	70.7979	40.4207	808.524
SCD088	HU treated SCD patient	389.03	25.63	615.105	51.73	321.35	79.025	467.445	17.685	72.69	6.69	103.66	45.81	83.96	650.9	1.5	65.785	10.33	3.39	42.11	6.375	2.3	6.205	5.81	4.775	388.24	9.76	3.77	60.325	1	131.32	0.06	134.145	4.36	1.05	7.33	23.865	0.725	2.63	1.425	6.02	0.91	164.21	2.68	411.62	33.89	10.7	23.81	822.63
SCD091	HU treated SCD patient	933.265	50.435	731.775	163.945	1462.84	75.575	264.085	30.245	406.155	40.505	195.8	36.61	166.46	345.22	2.555	222.445	5.795	16.19	152.22	88.24	14.455	43.975	717.44	4.935	1022.08	161.05	20.44	149.645	14.45	688.765	20.325	746.81	1388.32	0.69	17.77	109.905	1.645	12.825	3.715	13.275	5.865	143.895	36.665	49.895	47.225	120.085	61.29	699.955
SCD092	HU treated SCD patient	226.32	234.4	356.685	84.355	1035.61	44.4	21.8	15.685	54.2	6.69	42.895	17.23	19.52	1424.8	1.185	45.72	5.68	1.295	10.08	3.38	0.945	3.38	5.81	1.1	392.74	28.05	1.32	33.665	0.935	132.27	2.475	199.275	4.36	0.6	8.555	23.545	0.39	0.46	1.25	2.05	0.52	328.31	10.01	50.45	40.06	9.09	17.04	528.435
SCD109	HU treated SCD patient	232.475	24.43	466.98	68.015	1327.82	64.41	12.85	6.68	86.66	6.69	41.77	17.85	10.42	22328.2	1.31	15.69	3.26	1.175	10.555	0.76	0.09	1.33	5.81	0.485	600.71	2.73	0.365	16.035	0.905	42.055	0.06	11.56	4.36	0.5	4.61	8.27	0.405	0.32	0.715	1.575	0.525	182.185	3.785	112.065	31.33	6.05	76.79	600.055
SCD115	HU treated SCD patient	262.42	58.325	286.64	26.655	445.585	36.455	12.12	4.69	98.65	6.69	35.06	11.64	10.495	872.685	0.905	23.09	4.085	1.48	6.74	0.92	1.11	1.73	120.56	0.83	421.56	32.97	0.69	38.935	0.55	25.195	1.87	158.92	130.675	0.455	10.59	7.06	0.43	1.76	0.595	4.025	0.42	935.805	4.7	50.59	24.125	26.8	14.27	590.035
SCD086	HU treated SCD patient	801.3	14.95	1325.47	50.755	729.56	65.575	409.27	9.99	96.98	9.465	69.925	36.14	12.32	1568.3	2.035	49.725	8.05	6.7	24.675	2.64	1.97	2.855	75.815	4.7	588.04	47.19	1.715	24.1	3.815	95.74	7.065	493.945	45.415	0.54	6.65	4.985	0.425	1.735	1.04	7.2	0.905	489.13	20.26	264.205	33.55	11.78	68.68	746.96
SCD093	HU treated SCD patient	86.25	55.925	284.34	18.58	543.94	36.71	66.995	3.59	59.53	21.855	5.07	14.81	4.08	2008.66	0.945	27.935	4.145	0.665	1.18	4.05	0.62	1.63	5.81	1.3	581.55	2.73	0.15	20.82	0.69	21.815	0.06	11.56	7.505	0.465	4.61	7.96	0.495	1.125	0.925	2.89	0.35	426.385	2.68	134.78	81.16	4.28	25.4	238.56
SCD098	HU treated SCD patient	183.98	19.785	262.44	26.94	514.235	69.915	129.5	6.195	97.545	6.69	16	3.22	25.24	1280.65	1.165	23.85	6.155	1.41	40.27	1.355	0.09	0.14	27.005	4.58	148.595	2.73	1.35	40.585	5.37	28.52	14.415	762.92	4.36	0.42	39.205	103.92	0.355	0.32	0.46	4.08	1.365	171.37	5.615	115.72	26.015	19.005	12.465	304.405
SCD114	HU treated SCD patient	285.44	23.3	421.535	76.91	178.25	24.285	244.655	5.76	74.89	6.69	7.8	15.24	3.015	1495.99	1.4	17.995	5.03	0.03	0.17	0.01	1.27	0.835	21.46	3.12	232.615	2.73	0.15	27.84	0.475	1.88	0.82	280.165	4.36	0.44	16.555	2.245	0.91	1.11	0.51	3.62	0.38	407.95	1.955	145.41	20.56	0.81	5.905	429.24
average HU treated		377.831	56.3533	527.886	63.0983	728.798	55.15	180.969	11.1689	116.367	12.4406	57.5533	22.0611	37.2789	3552.82	1.44444	54.6928	5.83667	3.59278	32	11.97	2.53889	6.89778	109.502	2.86944	486.237	32.2156	3.32778	45.7722	3.13222	129.729	5.23889	311.033	177.08	0.573333	12.875	32.4172	0.642222	2.47611	1.18167	4.97056	1.24889	361.027	9.81667	148.304	37.5461	23.1778	33.9611	551.142
Table S2: Cytokine concentration (pg/mL) in7 healthy controls and 9 HU-treated HU patients
[truncated: 17 more columns]
